# Supplementary material for: Angular dependence of the exchange interaction in fluoride-bridged GdIII–CrIII complexes
Source: Royal Society of Chemistry journal article supplement (doi:10.1039/c3cc42552e), 2013-01-01
Supplement: c3cc42552e.pdf [file c3cc42552e.pdf]

# Electronic Supporting Information

## Angular dependence of the exchange interaction in fluoride-bridged Gd<sup>III</sup>-Cr<sup>III</sup> complexes

Saurabh Kumar Singh,<sup>b</sup> Kasper S. Pedersen,<sup>a</sup> Marc Sigrist,<sup>ac</sup> Christian Aa. Thuesen,<sup>a</sup> Magnus Schau-Magnussen,<sup>a</sup> Hannu Mutka,<sup>c</sup> Stergios Piligkos,<sup>a</sup> Høgni Weihe,<sup>a</sup> Gopalan Rajaraman<sup>b\*</sup> and Jesper Bendix<sup>a\*</sup>

### Molecular connectivities

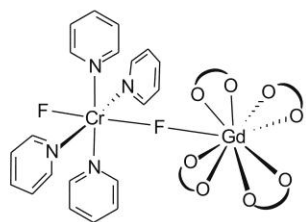

1: *trans*-[CrF<sub>2</sub>(py)<sub>4</sub>]Gd(hfac)<sub>4</sub>

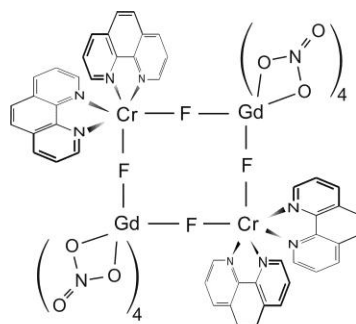

2: *cyclo*-{*cis*-[CrF<sub>2</sub>(phen)<sub>2</sub>]Gd(NO<sub>3</sub>)<sub>4</sub>}<sub>2</sub>

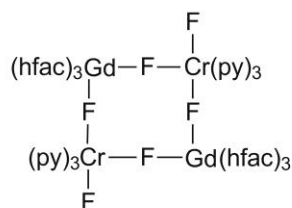

3: *cyclo*-{*mer*-[CrF<sub>3</sub>(py)<sub>3</sub>]Gd(hfac)<sub>3</sub>}<sub>2</sub>

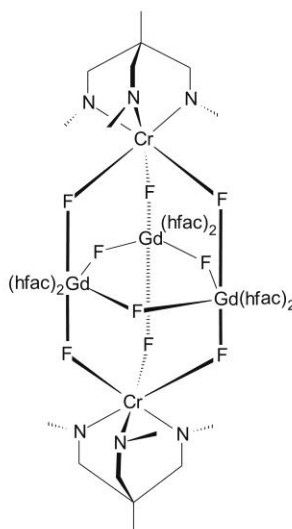

4: {*fac*-[CrF<sub>3</sub>(Me<sub>3</sub>tame)]}<sub>2</sub>Gd<sub>3</sub>(hfac)<sub>6</sub>}<sub>2</sub>

**Scheme S1.** Molecular connectivities for complexes 1-4.

# Electronic Supporting Information

## Synthesis

[Gd(hfac)<sub>3</sub>(H<sub>2</sub>O)<sub>2</sub>] and *trans*-[CrF<sub>2</sub>(py)<sub>4</sub>]NO<sub>3</sub> were synthesized as described in the literature.<sup>iii</sup> **1** was synthesized similarly to the isostructural Dy compound.<sup>iii</sup> To a solution of *trans*-[CrF<sub>2</sub>(py)<sub>4</sub>]NO<sub>3</sub> (1.2 g, 2.6 mmol) in chloroform (25 ml) was added a solution of one equivalent [Gd(hfac)<sub>3</sub>(H<sub>2</sub>O)<sub>2</sub>] (2.1 g, 2.6 mmol) in chloroform (40 ml). Red-violet, block-shaped crystals of [Gd(hfac)<sub>4</sub>-CrF<sub>2</sub>(py)<sub>4</sub>]·0.35CHCl<sub>3</sub> (**1**) were filtered off after 1 day and washed with successive aliquots of chloroform. The samples were stored in closed vials in a freezer to suppress solvent loss. Yield: 1.7 g; 46% (based on Cr), Anal. calc. (found) for (C<sub>40</sub>H<sub>24</sub>CrGdF<sub>26</sub>N<sub>4</sub>O<sub>8</sub>)·0.35(CHCl<sub>3</sub>): C: 33.8 % (33.43 %), H: 1.71 % (1.45 %), N: 3.91 % (4.01 %).

## Crystallography

Single-crystal X-ray diffraction data were collected at 122 K using a Nonius Kappa CCD area-detector diffractometer with Mo K $\alpha$  radiation ( $\lambda = 0.71073$  Å) equipped with an Oxford Cryostreams low-temperature device. The structures were solved using direct methods (SHELXS97) and refined using the SHELXL97 software package. (G. M. Sheldrick, Acta Crystallogr. Sect. A 64 (2008) 112-122.) All non-hydrogen atoms were refined anisotropically except for those of the co-crystallized CHCl<sub>3</sub>, whereas hydrogen atoms were fixed. CCDC-921006 contains the supplementary crystallographic data for this paper. These data can be obtained free of charge from The Cambridge Crystallographic Database via [www.ccdc.cam.uk/data\\_request/cif](http://www.ccdc.cam.uk/data_request/cif).

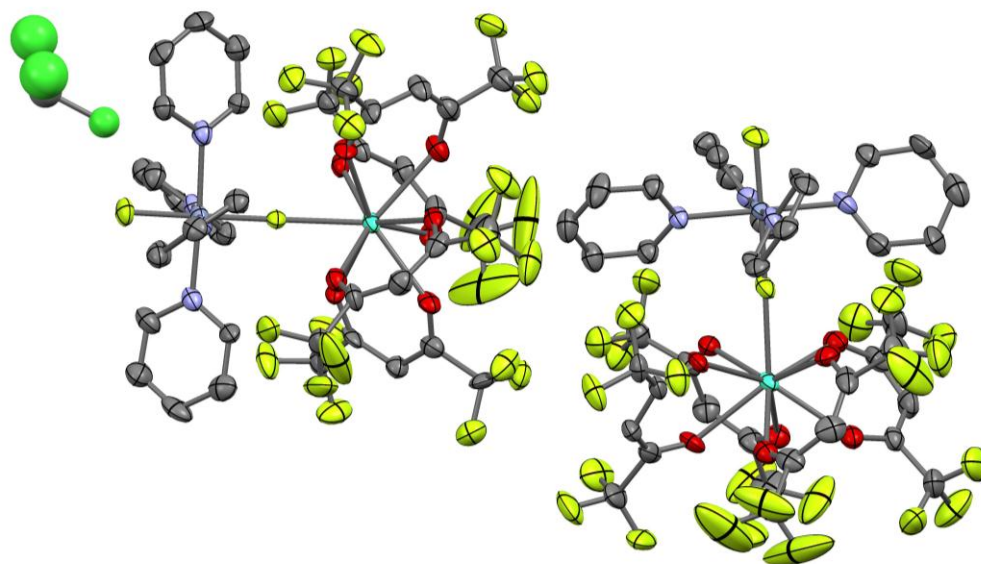

**Fig. S1.** Thermal ellipsoid plot (50 % probability level) of the asymmetric unit of **1**. Colour code: Gd, turquoise; Cr, dark blue; Cl, light green; F, yellow; O, red; N, blue; C, grey. Hydrogen atoms have been omitted for clarity.

# Electronic Supporting Information

**Table S1.** Crystallographic data for **1**.

| <b>1</b>                                                                |                                                                                                               |
|-------------------------------------------------------------------------|---------------------------------------------------------------------------------------------------------------|
| Formula                                                                 | (C <sub>40</sub> H <sub>24</sub> CrGdF <sub>26</sub> N <sub>4</sub> O <sub>8</sub> )·0.35(CHCl <sub>3</sub> ) |
| <i>M<sub>r</sub></i>                                                    | 1433.66                                                                                                       |
| Color, shape                                                            | Pink, prism                                                                                                   |
| crystal size/mm                                                         | 0.11 × 0.08 × 0.04                                                                                            |
| Crystal system                                                          | triclinic                                                                                                     |
| Space group                                                             | <i>P</i> $\bar{1}$                                                                                            |
| <i>T</i> /K                                                             | 122                                                                                                           |
| <i>a</i> /Å                                                             | 12.575(9)                                                                                                     |
| <i>b</i> /Å                                                             | 19.91 (3)                                                                                                     |
| <i>c</i> /Å                                                             | 21.36 (4) Å                                                                                                   |
| $\alpha$ /°                                                             | 85.44 (13)                                                                                                    |
| $\beta$ /°                                                              | 81.52 (11)                                                                                                    |
| $\gamma$ /°                                                             | 86.29 (10)°                                                                                                   |
| <i>V</i> /Å <sup>3</sup>                                                | 5264(13)                                                                                                      |
| <i>Z</i>                                                                | 4                                                                                                             |
| $\rho_{\text{cal}}/\text{g cm}^{-3}$                                    | 1.65                                                                                                          |
| <i>F</i> <sub>000</sub>                                                 | 2793                                                                                                          |
| $\mu(\text{Mo } K\alpha)/\text{mm}^{-1}$                                | 1.65                                                                                                          |
| $\theta$ range/°                                                        | 2.0–25.2                                                                                                      |
| collected reflns                                                        | 150717                                                                                                        |
| unique reflns                                                           | 18466                                                                                                         |
| params/restraints                                                       | 1458/3                                                                                                        |
| reflns ( <i>I</i> > 2 $\sigma$ ( <i>I</i> ))                            | 11906                                                                                                         |
| GoF                                                                     | 1.02                                                                                                          |
| <i>R</i> 1 <sup><i>a</i></sup> ( <i>I</i> > 2.00 $\sigma$ ( <i>I</i> )) | 0.089                                                                                                         |
| <i>R</i> 1 <sup><i>a</i></sup> (all data)                               | 0.1471                                                                                                        |
| <i>wR</i> 2 <sup><i>b</i></sup> (all data)                              | 0.239                                                                                                         |
| max/min $\Delta\rho_r/\text{e } \text{\AA}^{-3}$                        | 4.35 / -3.14                                                                                                  |

$$^a R1 = \frac{\sum ||F_o| - |F_c||}{\sum |F_o|}, \quad ^b wR2 = \left[ \frac{\sum w(F_o^2 - F_c^2)^2}{\sum w(F_o^2)^2} \right]^{1/2}$$

# Electronic Supporting Information

## Magnetic measurements

All magnetic measurements were performed on a Quantum Design MPMS-XL equipped with a 5 T dc magnet. The susceptibility was approximated as  $\chi = M/H_{dc}$  where  $H_{dc} = 1000$  Oe. Magnetization measurements were performed with fields from 1 to 5 T and at selected temperatures. All data were corrected for diamagnetic contributions from the sample (by means of Pascal constants) and from the sample holder and crystallite-immobilizing 1-octadecene oil.

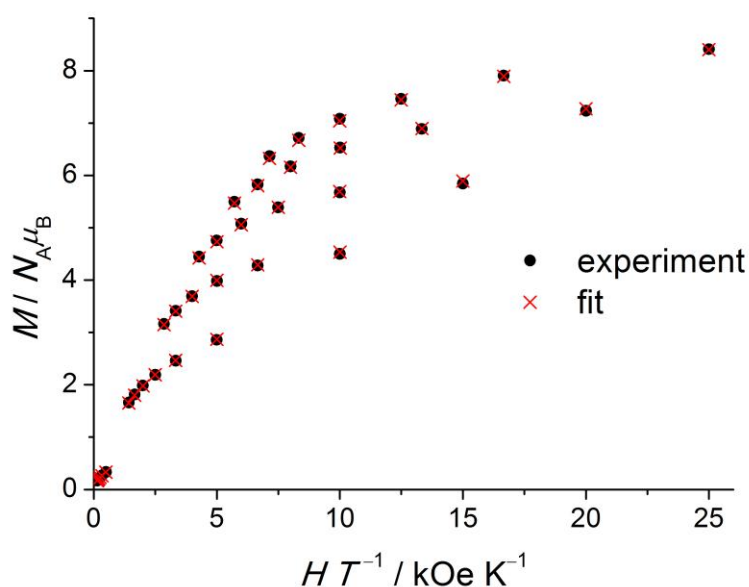

Fig. S2. Magnetization data and best-fit for **1** as described in the main text.

## Inelastic neutron scattering

INS experiments on **1** were performed at the direct geometry time-of-flight spectrometer IN5 located at Institut Laue-Langevin (Grenoble, France). The time-of-flight to energy conversion and data reduction were performed using the LAMP package<sup>iv</sup>. Around 2 g of non-deuterated **1** was loaded in a double-wall aluminum can and placed in a standard ILL orange cryostat. The intensity was summed over the complete  $Q$  range. INS spectra were simulated with the "ins" program developed by Dr. Høgni Weihe (University of Copenhagen).

## Electronic Supporting Information

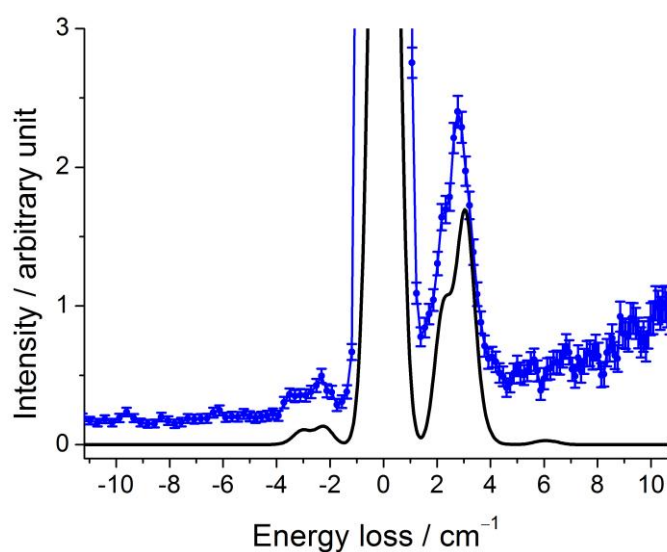

**Fig. S3.** INS spectrum of **1** obtained with  $\lambda_i = 4.8 \text{ \AA}$  and  $T = 1.5 \text{ K}$ . The calculated spectrum utilized  $J = 0.87 \text{ cm}^{-1}$  and  $D_{Cr} = 0.50 \text{ cm}^{-1}$ .

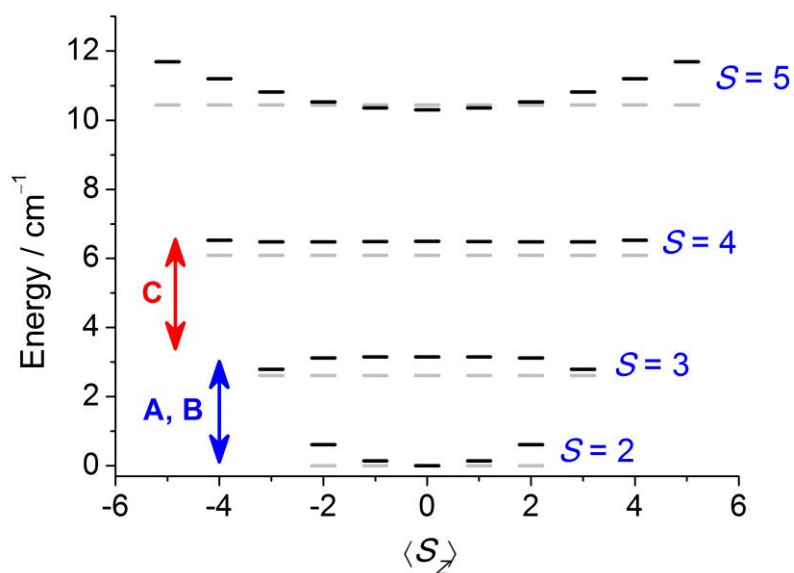

**Fig. S4.** Black lines: Calculated energy levels with  $J = 0.87 \text{ cm}^{-1}$  and  $D_{Cr} = 0.50 \text{ cm}^{-1}$ . Grey lines:  $J = 0.87 \text{ cm}^{-1}$  and  $D_{Cr} = 0$ .

## Electronic Supporting Information

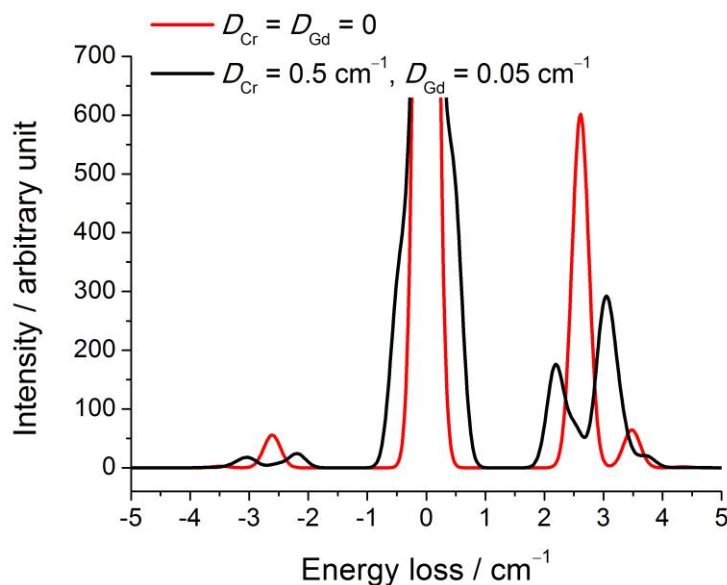

**Fig. S5.** Calculated INS spectra with and without inclusion of the zero-field splitting terms for Cr<sup>III</sup> and Gd<sup>III</sup>. In both cases is  $J = 0.87 \text{ cm}^{-1}$ .

### Computational Details

The spin Hamiltonian which is used for to estimate the magnetic interaction between Cr<sup>III</sup> and Gd<sup>III</sup> ions is described here,

$$\hat{H} = J \cdot S_{Gd} \cdot S_{Cr}$$

Here  $J$  is the isotropic exchange coupling constant and  $S_{Gd}$  and  $S_{Cr}$  are the spins on Gd<sup>III</sup> ( $S=7/2$ ) and Cr<sup>III</sup> ( $S=3/2$ ) atoms respectively. The DFT calculations combined with Broken Symmetry (BS) approach<sup>v</sup> has been employed to compute the  $J$  values. The BS method has a proven record of yielding good numerical estimates of  $J$  constants for a variety of complexes.<sup>vi-vii</sup> A detailed technical discussion on computational details on the evaluation of  $J$  values using broken symmetry approach on dinuclear as well polynuclear complexes can be found elsewhere.<sup>viii</sup> We have performed most of calculations using the Gaussian 09 suite of programs.<sup>ix</sup> We have employed a hybrid B3LYP functional<sup>x</sup> along with a double-zeta quality basis set employing Cundari-Stevens (CS) relativistic effective core potential on Gd atom<sup>xi</sup> and TZV basis set on Cr<sup>xii</sup> and the rest of the atoms. A comprehensive method assessment performed earlier on {Cu-Gd} complexes by us, reveal that this combination yield good estimate of the  $J$  constants. A very tight SCF ( $1 \times 10^{-8} \text{ Eh}$ ) convergence has been employed throughout. All magneto-structural calculations have been performed by varying the specific structural parameters and performing single point calculations on the modified structure.

## Electronic Supporting Information

**Table S2.** DFT computed energies of high spin (HS) and broken symmetry (BS) state,  $\langle S^2 \rangle$  values for the parent dinuclear {Cr-Gd} complex.

| Complex  | Total Energy   |                | $\langle S^2 \rangle$ values |        | $J$ values / $\text{cm}^{-1}$ |
|----------|----------------|----------------|------------------------------|--------|-------------------------------|
|          | HS             | BS             | HS                           | BS     |                               |
| <b>1</b> | -6112.56625531 | -6112.56630034 | 30.0279                      | 9.0280 | 0.82                          |

**Table S3.** DFT computed spin densities on **1** in HS and the BS states. Atom numbers refer to the numbering provided in the picture of **1** below:

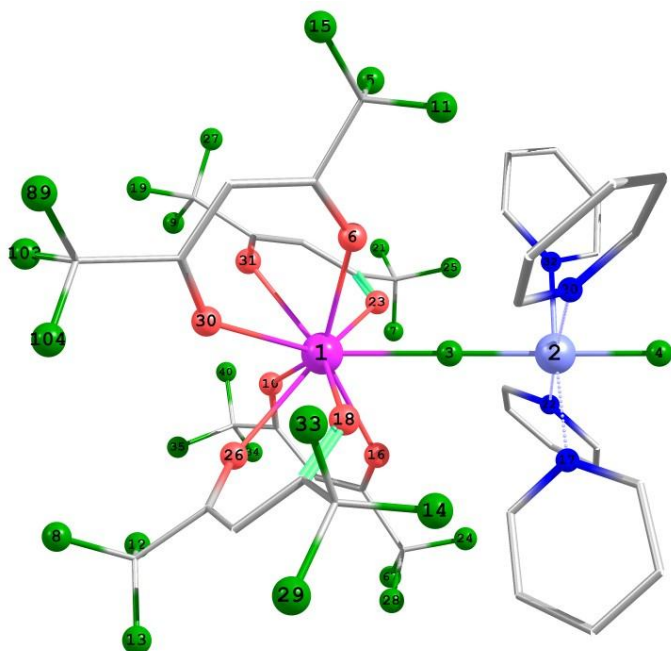

|      |          |      |           |
|------|----------|------|-----------|
| 1 Gd | 7.028167 | 1 Gd | 7.027730  |
| 2 Cr | 3.090067 | 2 Cr | -3.092583 |
| 3 F  | 0.016876 | 3 F  | -0.017468 |
| 4 F  | 0.033375 | 4 F  | -0.033694 |

## Electronic Supporting Information

|      |           |      |           |
|------|-----------|------|-----------|
| 5 F  | 0.000008  | 5 F  | 0.000007  |
| 6 O  | -0.003007 | 6 O  | -0.002844 |
| 7 F  | -0.000007 | 7 F  | -0.000007 |
| 8 F  | -0.000029 | 8 F  | -0.000026 |
| 9 F  | -0.000041 | 9 F  | -0.000039 |
| 10 O | -0.001783 | 10 O | -0.001848 |
| 11 F | 0.000054  | 11 F | 0.000017  |
| 12 F | 0.000006  | 12 F | 0.000006  |
| 13 F | -0.000014 | 13 F | -0.000017 |
| 14 F | 0.000043  | 14 F | 0.000008  |
| 15 F | -0.000042 | 15 F | -0.000048 |
| 16 O | -0.002811 | 16 O | -0.002713 |
| 17 N | -0.068182 | 17 N | 0.068004  |
| 18 O | -0.002751 | 18 O | -0.002649 |
| 19 F | 0.000007  | 19 F | 0.000007  |
| 20 N | -0.069340 | 20 N | 0.069222  |
| 21 F | -0.000034 | 21 F | -0.000038 |
| 22 N | -0.069563 | 22 N | 0.069421  |
| 23 O | -0.002394 | 23 O | -0.002205 |
| 24 F | 0.000050  | 24 F | 0.000010  |
| 25 F | 0.000049  | 25 F | 0.000011  |
| 26 O | -0.001977 | 26 O | -0.002057 |
| 27 F | 0.000001  | 27 F | -0.000002 |
| 28 F | 0.000010  | 28 F | 0.000007  |
| 29 F | -0.000037 | 29 F | -0.000042 |
| 30 O | -0.002010 | 30 O | -0.002100 |
| 31 O | -0.001968 | 31 O | -0.002067 |
| 32 N | -0.073187 | 32 N | 0.073028  |
| 33 F | 0.000000  | 33 F | -0.000001 |
| 34 F | -0.000028 | 34 F | -0.000029 |
| 35 F | -0.000009 | 35 F | -0.000007 |
| 36 C | 0.021627  | 36 C | -0.021663 |
| 37 H | -0.000787 | 37 H | 0.000778  |
| 38 C | 0.020477  | 38 C | -0.020440 |
| 39 H | -0.000996 | 39 H | 0.000894  |
| 40 F | 0.000028  | 40 F | 0.000028  |
| 41 C | 0.022747  | 41 C | -0.022799 |
| 42 H | 0.000171  | 42 H | -0.000212 |
| 43 C | 0.000395  | 43 C | 0.000379  |
| 44 H | 0.000013  | 44 H | 0.000008  |
| 45 C | -0.000494 | 45 C | -0.000493 |
| 46 C | -0.000492 | 46 C | -0.000494 |
| 47 C | 0.000294  | 47 C | 0.000351  |
| 48 H | 0.000013  | 48 H | 0.000005  |
| 49 C | -0.013858 | 49 C | 0.013910  |
| 50 H | 0.000452  | 50 H | -0.000460 |



## Electronic Supporting Information

|      |           |      |           |
|------|-----------|------|-----------|
| 51 C | 0.000207  | 51 C | 0.000192  |
| 52 H | 0.000019  | 52 H | 0.000014  |
| 53 C | 0.017994  | 53 C | -0.018011 |
| 54 H | -0.000854 | 54 H | 0.000853  |
| 55 C | -0.000768 | 55 C | -0.000822 |
| 56 C | -0.000577 | 56 C | -0.000540 |
| 57 C | 0.019113  | 57 C | -0.019017 |
| 58 H | -0.000145 | 58 H | -0.000009 |
| 59 C | -0.011768 | 59 C | 0.011805  |
| 60 H | 0.000361  | 60 H | -0.000367 |
| 61 C | 0.019619  | 61 C | -0.019658 |
| 62 H | -0.000837 | 62 H | 0.000830  |
| 63 C | 0.000388  | 63 C | 0.000341  |
| 64 H | 0.000016  | 64 H | 0.000013  |
| 65 C | -0.000437 | 65 C | -0.000433 |
| 66 C | -0.001110 | 66 C | -0.001206 |
| 67 F | -0.000035 | 67 F | -0.000045 |
| 68 C | -0.000993 | 68 C | -0.001046 |
| 69 C | -0.001028 | 69 C | -0.001062 |
| 70 C | -0.012484 | 70 C | 0.012499  |
| 71 H | 0.000364  | 71 H | -0.000368 |
| 72 C | -0.011089 | 72 C | 0.011109  |
| 73 H | 0.000464  | 73 H | -0.000465 |
| 74 C | 0.021109  | 74 C | -0.020984 |
| 75 H | -0.000468 | 75 H | 0.000293  |
| 76 C | -0.000052 | 76 C | -0.000051 |
| 77 C | -0.000031 | 77 C | -0.000035 |
| 78 C | -0.012018 | 78 C | 0.012040  |
| 79 H | 0.000530  | 79 H | -0.000530 |
| 80 C | 0.019019  | 80 C | -0.019057 |
| 81 H | -0.000981 | 81 H | 0.000972  |
| 82 C | -0.000459 | 82 C | -0.000514 |
| 83 C | -0.000526 | 83 C | -0.000494 |
| 84 C | -0.010251 | 84 C | 0.010273  |
| 85 H | 0.000452  | 85 H | -0.000453 |
| 86 C | -0.011157 | 86 C | 0.011178  |
| 87 H | 0.000452  | 87 H | -0.000452 |
| 88 C | -0.000154 | 88 C | -0.000151 |
| 89 F | -0.000031 | 89 F | -0.000033 |
| 90 C | 0.018064  | 90 C | -0.018078 |
| 91 H | -0.000867 | 91 H | 0.000867  |
| 92 C | -0.011922 | 92 C | 0.011973  |
| 93 H | 0.000365  | 93 H | -0.000371 |
| 94 C | -0.000287 | 94 C | -0.000297 |
| 95 C | -0.000420 | 95 C | -0.000420 |
| 96 C | 0.017208  | 96 C | -0.017227 |

## Electronic Supporting Information

|       |           |       |           |
|-------|-----------|-------|-----------|
| 97 H  | -0.000863 | 97 H  | 0.000862  |
| 98 C  | 0.018954  | 98 C  | -0.018994 |
| 99 H  | -0.000831 | 99 H  | 0.000822  |
| 100 C | 0.021099  | 100 C | -0.021117 |
| 101 H | -0.001016 | 101 H | 0.001015  |
| 102 C | -0.000453 | 102 C | -0.000454 |
| 103 F | -0.000004 | 103 F | -0.000002 |
| 104 F | 0.000027  | 104 F | 0.000026  |

## Electronic Supporting Information

**Table S4.** DFT computed spin densities on metal ions and bridged fluoride ions at several different bond angles.

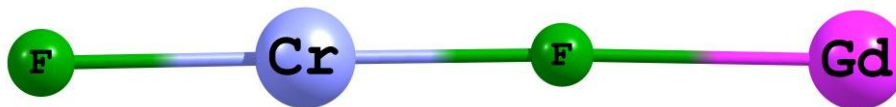

| Bond Angle | Spin densities |       |            |            |
|------------|----------------|-------|------------|------------|
|            | Gd             | Cr    | F-bridging | F-Terminal |
| 180        | 7.028          | 3.090 | 0.016      | 0.033      |
| 170        | 7.028          | 3.090 | 0.016      | 0.033      |
| 160        | 7.028          | 3.093 | 0.015      | 0.033      |
| 150        | 7.029          | 3.095 | 0.014      | 0.033      |
| 140        | 7.031          | 3.096 | 0.012      | 0.034      |
| 135        | 7.031          | 3.099 | 0.011      | 0.034      |

**Table S5.** Computed Overlap Integral for Cr-Gd pairs at higher and lower angle.

| Bond Angle-178.3 |                 | $J = 0.82 \text{ cm}^{-1}$ |                 | Bond Angle-135 |                 | $J = -0.12 \text{ cm}^{-1}$ |                 |
|------------------|-----------------|----------------------------|-----------------|----------------|-----------------|-----------------------------|-----------------|
| Gd- orbitals     | Cr ( $d_{xz}$ ) | Cr ( $d_{yz}$ )            | Cr ( $d_{xy}$ ) | Gd- orbitals   | Cr ( $d_{xz}$ ) | Cr ( $d_{yz}$ )             | Cr ( $d_{xy}$ ) |
|                  | 331             | 332                        | 333             |                | 329             | 330                         | 331             |
| 387              | 0.003           | 0.006                      | 0.001           | 378            | -0.003          | 0.001                       | -0.001          |
| 391              | 0.006           | 0.003                      | 0.002           | 381            | -0.003          | 0.001                       | -0.002          |
| 393              | 0.006           | 0.000                      | 0.001           | 382            | 0.004           | -0.001                      | 0.003           |
| 395              | -0.002          | 0.006                      | 0.001           | 385            | 0.003           | 0.006                       | 0.002           |
| 397              | 0.001           | -0.007                     | -0.005          | 386            | 0.001           | 0.006                       | 0.005           |
| 398              | 0.008           | -0.005                     | 0.003           | 387            | 0.004           | -0.003                      | 0.001           |
| 399              | -0.005          | 0.004                      | 0.002           | 392            | -0.004          | 0.006                       | -0.003          |

## Electronic Supporting Information

**Figure S6.** The four representative d-f-orbitals (a spin on left ( $\text{Cr}^{\text{III}}$ ) and b on right ( $\text{Gd}^{\text{III}}$ )), which show the strongest overlap at angles close to 180. The isodensity surface represented corresponds to a value of  $0.03 \text{ e}^-/\text{bohr}^3$ .

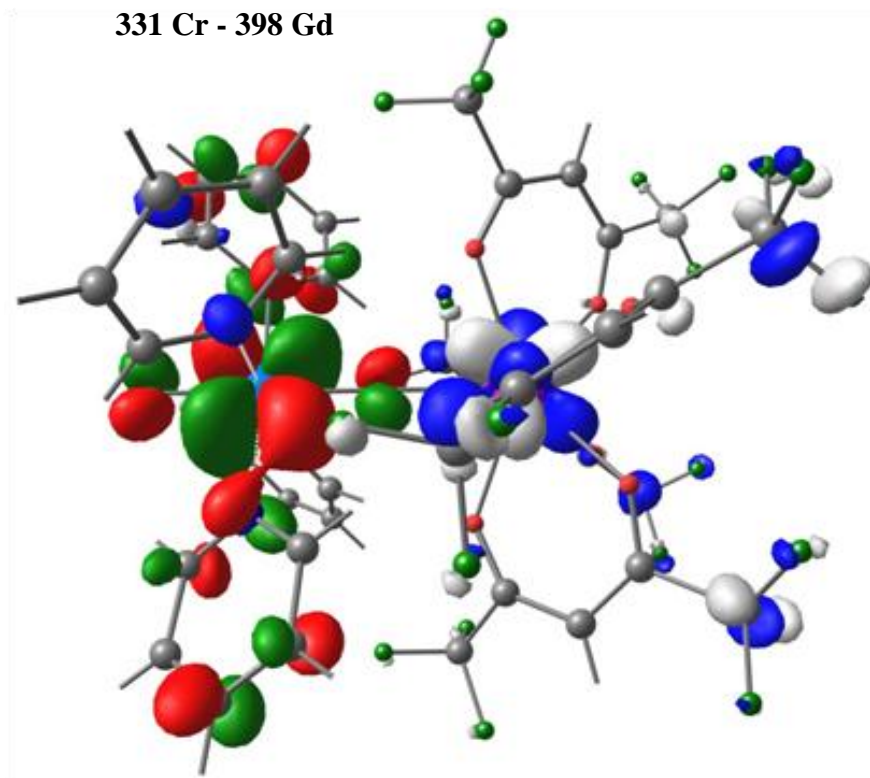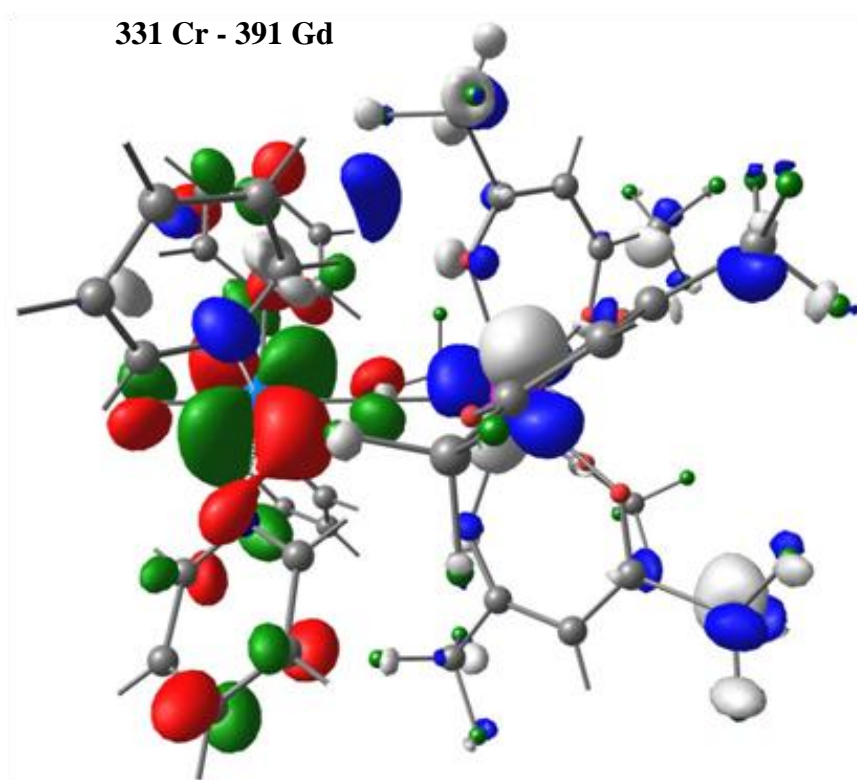

# Electronic Supporting Information

331 Cr - 393 Gd

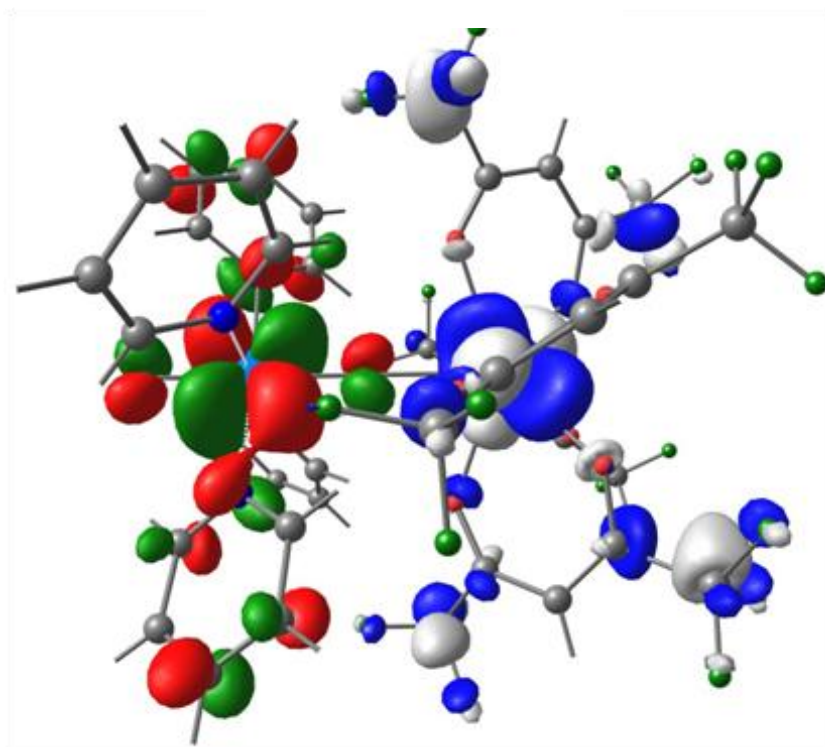

332 Cr - 397 Gd

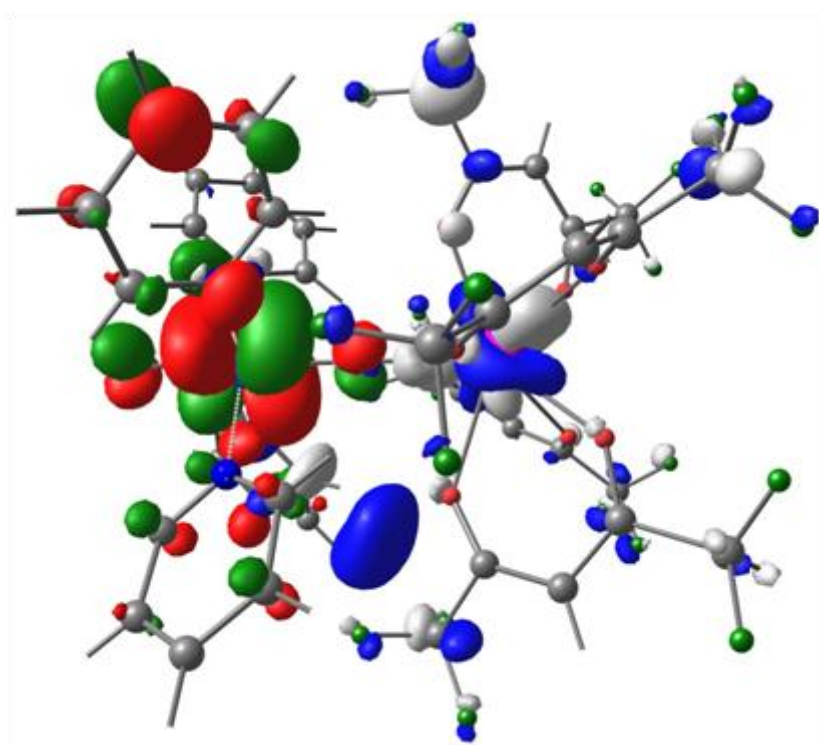

## Electronic Supporting Information

**Table S6.** Computed NBO occupation for the {CrGd} pair at minimum and maximum bond angles.

| <i>Orbitals</i> | <i>Angle 135</i> | <i>Angle 180</i> |
|-----------------|------------------|------------------|
| 6s              | 0.20             | 0.20             |
| 4f              | 7.01             | 7.01             |
| 5d              | 0.38             | 0.35             |

### References

- <sup>i</sup> J. Glerup, J. Josephsen, K. Michelsen, E. Pedersen and C. E. Schäffer, *Acta. Chem. Scand.*, 1970, **24**, 247
- <sup>ii</sup> M. F. Richardson, W. F. Wagner and D. E. J. Sands, *Inorg. Nucl. Chem.*, 1968, **30**, 1275.
- <sup>iii</sup> J. Dreiser, K. S. Pedersen, C. Piamonteze, S. Rusponi, Z. Salman, Md. E. Ali, M. Schau-Magnussen, C. Aa. Thuesen, S. Piligkos, H. Weihe, H. Mutka, O. Waldmann, P. Oppeneer, J. Bendix, F. Nolting, H. Brune, *Chem. Sci.*, 2012, **3**, 1024-1032.
- <sup>iv</sup> D. Richard, M. Ferrand and G. J. Kearley, *J. Neutron Res.*, 1996, **4**, 33-39.
- <sup>v</sup> L. Noodleman, *J. Chem. Phys.*, 1981, **74**, 5737.
- <sup>vi</sup> E. Ruiz, S. Alvarez, A. Rodriguez-Forteza, P. Alemany, Y. Pouillon and C. Massobrio, in "Magnetism: Molecules to Materials", Vol. II ed J. S. Miller, M. Drillon, Wiley-VCH, Weinheim, 2001, pp-227
- <sup>vii</sup> A. Bencini and F. Totti, *Int. J. Quan. Chem.*, 2005, **6**, 819.
- <sup>viii</sup> E. Ruiz, S. Alvarez, J. Cano and P. Alemany, *J. Comput. Chem.*, 1999, **20**, 1391; E. Ruiz, A. R. Forteza, J. Cano, S. Alvarez and P. Alemany, *J. Comput. Chem.*, 2003, **24**, 982; E. Ruiz, J. Cano, S. Alvarez, A. Caneschi and D. Gatteschi, *J. Am. Chem. Soc.*, 2003, **125**, 6791; G. Rajaraman, J. Cano, E. K. Brechin and E. J. L. McInnes, *Chem. Comm.*, 2004, 1476; P. Christian, G. Rajaraman, A. Harrison, M. Helliwell, J. J. W. McDouall, J. Raftery and R. E. P. Winpenny, *Dalton Trans.*, 2004, 2550.

## Electronic Supporting Information

---

<sup>ix</sup> M. J. Frisch, G. W. Trucks, H. B. Schlegel, G. E. Scuseria, M. A. Robb, J. R. Cheeseman, G. Scalmani, V. Barone, B. Mennucci, G. A. Petersson, H. Nakatsuji, M. Caricato, X. Li, H. P. Hratchian, A. F. Izmaylov, J. Bloino, G. Zheng, J. L. Sonnenberg, M. Hada, M. Ehara, K. Toyota, R. Fukuda, J. Hasegawa, M. Ishida, T. Nakajima, Y. Honda, O. Kitao, H. Nakai, T. Vreven, J. A. Montgomery Jr., J. E. Peralta, F. Ogliaro, M. Bearpark, J. J. Heyd, E. Brothers, K. N. Kudin, V. N. Staroverov, R. Kobayashi, J. Normand, K. Raghavachari, A. Rendell, J. C. Burant, S. S. Iyengar, J. Tomasi, M. Cossi, N. Rega, J. M. Millam, M. Klene, J. E. Knox, J. B. Cross, V. Bakken, C. Adamo, J. Jaramillo, R. Gomperts, R. E. Stratmann, O. Yazyev, A. J. Austin, R. Cammi, C. Pomelli, J. W. Ochterski, R. L. Martin, K. Morokuma, V. G. Zakrzewski, G. A. Voth, P. Salvador, J. J. Dannenberg, S. Dapprich, A. D. Daniels, Ö. Farkas, J. B. Foresman, J. V. Ortiz, J. Cioslowski and D. J. Fox, GAUSSIAN 09 (Revision A.1), Gaussian, Inc., Wallingford, CT, 2009.

<sup>x</sup> T. R. Cundari and W. J. Stevens, *J. Chem. Phys.*, 1993, **98**, 5555.

<sup>xi</sup> A. D. Becke, *J. Chem. Phys.*, 1993, **98**, 5648.

<sup>xii</sup> A. Schafer, C. Huber and R. Ahlrichs, *J. Chem. Phys.*, 1994, **100**, 5829.
